# Supplementary material for: Investigating changes within the handling system of the largest semi-captive population of Asian elephants
Source: PLoS One. 2019 Jan 31;14(1):e0209701. doi: 10.1371/journal.pone.0209701 (PMC6354975; doi:10.1371/journal.pone.0209701)
Supplement: S1 Dataset — (CSV) [file pone.0209701.s003.csv]

M.0.1_Interviewer	M.0.2_Position	M.2_Handler_age_cat	M.3_First_MTE	M.0.3_Time_mahout(m)	M.4a_Pae_Cheik	M.4b_Time_Pae_Cheik(m)	M.5_Number_eles	M.6_Sex_prefererence	M.7_Bull	M.8_Job_future	M.9_Grandfather_M	M.9_Brother_M	M.9_Brother_SG	M.9_Father_SG	M.9_Father_M	M.9_Uncle_SG	M.9_Uncle_O	M.9_InLaw_SG	M.9_InLaw_M	M.9_Son_SG	M.9_Son_M	M.9_Family_M	M.9_Family_SG	M.9_Family_Total	M.10_Married	M.11_Children_cat	M.12_Children_mahout	M.13_Taming_number	M.14a_Taming_attitude	M.14b_Reason1	M.15a_Taming_change	M.15b_Reason2	M.16_Taming_emotion	M.17a_Positive_reinforcement	M.17b_Reason3	M.18a_Obedient	M.18b_Friendly	M.18c_Responsive	M.18d_Interesting	M.18e_Opinion	M.18f_Health	M.18g_Oozies	M.18h_danger	M.18i_Social	M.18j_Job	M.18k_Clever	M.18l_Patience	M.18m.Experience_nec	M.18n_Beautiful
E	Mahout	(15,20]	2013	48	No	NA	2	No_pref	No	Long_term	0	0	0	0	0	0	0	0	0	0	0	0	0	0	Yes	(1,3]	No	2	Yes	more obedient	No	NA	Normal	NA	NA	1	1	NA	1	1	1	1	1	1	1	1	1	1	1
A	Mahout	(15,20]	2015	25	No	NA	4	Male	No	Long_term	0	4	0	0	1	0	0	0	0	0	0	5	0	5	No	0	NA	2	Yes	more clever	No	NA	Pity_nec	Yes	NA	2	1	1	1	1	3	1	1	3	1	1	1	2	1
NA	Mahout	(15,20]	2017	3	No	NA	2	Male	No	Short_term	0	1	0	0	0	0	0	0	0	0	0	1	0	1	No	0	NA	0	NA	NA	NA	NA	NA	NA	NA	2	1	2	1	1	3	NA	1	2	3	1	1	1	1
NA	Mahout	(20,25]	NA	5	NA	NA	2	NA	NA	NA	NA	NA	NA	0	0	NA	NA	NA	NA	NA	NA	5	0	5	NA	NA	NA	NA	NA	NA	NA	NA	NA	NA	NA	NA	NA	NA	NA	NA	NA	NA	NA	NA	NA	NA	NA	NA	NA
C	Mahout	(15,20]	2017	2	No	NA	1	Female	No	Long_term	0	0	0	0	0	0	0	0	0	0	0	0	0	0	No	0	NA	0	NA	NA	NA	NA	NA	NA	NA	1	1	1	1	1	3	1	1	3	1	1	1	1	1
F	Mahout	(35,40]	2013	36	No	NA	3	Male	Yes	Long_term	0	1	0	0	0	0	0	0	0	0	0	1	0	1	Yes	(1,3]	No	2	Yes	clever, obedient	No	NA	Pity_nec	Yes	no hurt in future	4	2	4	1	1	2	1	1	2	1	1	1	1	1
NA	Mahout	(20,25]	NA	50	NA	NA	2	NA	NA	NA	NA	NA	NA	0	0	NA	NA	NA	NA	NA	NA	3	0	3	NA	NA	NA	NA	NA	NA	NA	NA	NA	NA	NA	NA	NA	NA	NA	NA	NA	NA	NA	NA	NA	NA	NA	NA	NA
D	Mahout	(20,25]	2015	16	Yes	2.5	4	No_pref	No	Long_term	0	0	0	0	0	0	0	0	0	0	0	0	0	0	Yes	(1,3]	No	0	NA	NA	NA	NA	NA	NA	NA	2	2	NA	1	1	2	1	1	2	1	1	1	1	1
NA	Mahout	(10,15]	2017	3	No	NA	1	Female	No	Depends	0	0	0	0	0	0	0	0	0	0	0	0	0	0	No	0	NA	0	NA	NA	NA	NA	NA	NA	NA	2	2	3	1	1	3	1	1	1	1	1	1	1	1
D	Mahout	(20,25]	2016	7	Yes	1	2	No_pref	No	Long_term	0	1	0	0	0	0	0	0	0	0	0	1	0	1	Yes	(1,3]	No	1	No	pity	Yes	NA	Upset	Yes	kinder	2	2	2	1	1	2	1	1	3	2	1	2	1	1
E	Mahout	(25,30]	2014	33	No	NA	3	No_pref	No	Long_term	0	0	0	0	0	0	0	0	0	0	0	0	0	0	Yes	(3,6]	No	1	Yes	kinder to elephant	No	NA	Normal	No	NA	1	1	NA	1	1	1	1	1	1	1	1	1	1	1
E	Mahout	(15,20]	2013	48	No	NA	4	Male	No	Long_term	0	1	0	1	0	0	0	0	0	0	0	1	1	2	No	0	NA	1	Yes	more obedient	No	NA	Normal	NA	NA	1	1	1	1	1	1	1	1	1	1	1	1	1	1
NA	Mahout	(35,40]	NA	288	NA	NA	2	NA	NA	NA	NA	NA	NA	0	1	NA	NA	NA	NA	NA	NA	1	0	1	NA	NA	NA	NA	NA	NA	NA	NA	NA	NA	NA	NA	NA	NA	NA	NA	NA	NA	NA	NA	NA	NA	NA	NA	NA
NA	Mahout	(15,20]	NA	15	NA	NA	2	NA	NA	NA	NA	NA	NA	0	1	NA	NA	NA	NA	NA	NA	1	0	1	NA	NA	NA	NA	NA	NA	NA	NA	NA	NA	NA	NA	NA	NA	NA	NA	NA	NA	NA	NA	NA	NA	NA	NA	NA
E	Mahout	(20,25]	2016	12	No	NA	4	No_pref	No	Long_term	0	0	0	0	0	0	0	0	0	0	0	0	0	0	Yes	(1,3]	NA	1	Yes	for obedience	Yes	to control, need both punishment and rewards	Pity_nec	Sometimes	need both	1	1	1	1	1	2	1	1	1	1	1	1	1	1
E	Mahout	(45,50]	2016	4	Yes	1	1	No_pref	No	Long_term	0	0	0	0	0	0	0	0	0	0	0	0	0	0	Yes	(3,6]	No	0	Yes	can do more things	No	it is good how it is	Normal	No	after training, easier to control	1	1	2	1	1	2	2	1	2	1	1	1	1	1
C	Mahout	(15,20]	2016	4	No	NA	1	Male	No	Long_term	0	0	0	0	0	0	1	0	0	0	0	1	0	1	No	0	NA	0	NA	NA	NA	NA	NA	NA	NA	1	1	1	1	1	2	1	1	1	1	1	1	1	1
E	Mahout	(10,15]	2016	6	No	NA	2	No_pref	No	Long_term	0	1	0	0	0	0	0	0	0	0	0	1	0	1	No	0	NA	0	NA	NA	NA	NA	NA	NA	NA	1	1	1	1	1	1	1	1	1	1	1	1	1	1
C	Mahout	(15,20]	2015	16	No	NA	3	Male	No	Long_term	0	0	0	0	0	0	0	0	0	0	0	0	0	0	No	0	NA	1	Yes	after taming, obedient	No	NA	Pity_nec	No	NA	1	1	1	1	1	2	1	2	1	2	1	1	1	1
NA	Mahout	(40,45]	NA	4	NA	NA	1	NA	NA	NA	NA	NA	NA	0	0	NA	NA	NA	NA	NA	NA	0	0	0	NA	NA	NA	NA	NA	NA	NA	NA	NA	NA	NA	NA	NA	NA	NA	NA	NA	NA	NA	NA	NA	NA	NA	NA	NA
NA	Mahout	(55,60]	NA	348	NA	NA	2	NA	NA	NA	NA	NA	NA	0	0	NA	NA	NA	NA	NA	1	1	0	1	NA	NA	NA	NA	NA	NA	NA	NA	NA	NA	NA	NA	NA	NA	NA	NA	NA	NA	NA	NA	NA	NA	NA	NA	NA
NA	Mahout	(20,25]	NA	5	NA	NA	1	NA	NA	NA	NA	NA	NA	0	0	NA	NA	NA	NA	NA	NA	0	0	0	NA	NA	NA	NA	NA	NA	NA	NA	NA	NA	NA	NA	NA	NA	NA	NA	NA	NA	NA	NA	NA	NA	NA	NA	NA
A	Mahout	(15,20]	2014	36	No	NA	4	Male	No	Long_term	0	6	0	0	0	0	0	0	0	0	0	6	0	6	Yes	(1,3]	Yes	1	Yes	NA	No	NA	Pity_nec	Sometimes	NA	2	1	1	1	1	2	1	2	2	1	2	1	1	1
D	Mahout	(20,25]	2016	7	Yes	1	1	No_pref	No	Depends	0	0	0	0	0	0	0	0	0	0	0	0	0	0	No	0	NA	0	NA	NA	NA	NA	NA	NA	NA	2	2	NA	1	2	2	NA	1	4	2	1	2	1	1
NA	Mahout	(15,20]	2015	30	No	NA	3	No_pref	Yes	Long_term	0	0	0	1	0	0	0	0	0	0	0	0	1	1	No	0	NA	1	Yes	good for young elephants to tame	Yes	to have no pain	Pity_nec	Yes	so young eles obey	1	1	1	1	1	2	1	1	1	1	1	1	1	1
C	Mahout	(30,35]	2016	6	No	NA	1	Female	No	Long_term	0	0	0	0	0	0	0	0	0	0	0	0	0	0	No	0	NA	0	NA	NA	NA	NA	NA	NA	NA	1	1	1	1	1	2	1	1	1	1	1	1	1	1
E	Mahout	(15,20]	2016	6	No	NA	1	No_pref	No	Depends	0	0	0	0	0	0	0	0	0	0	0	0	0	0	Yes	0	NA	0	NA	NA	NA	NA	NA	NA	NA	NA	NA	NA	NA	NA	4	1	1	2	2	1	2	1	1
C	Mahout	(15,20]	2016	6	No	NA	1	Male	No	Long_term	0	1	0	0	0	1	3	0	0	0	0	4	1	5	No	0	NA	0	NA	NA	NA	NA	NA	NA	NA	1	1	1	1	1	3	1	1	1	1	2	1	1	1
E	Mahout	(10,15]	2016	6	No	NA	2	No_pref	No	Long_term	0	2	0	0	0	0	0	0	0	0	0	2	0	2	No	0	NA	1	Yes	more obedient	Yes	for greater understanding	Normal	NA	NA	1	1	NA	1	1	3	1	1	1	1	1	1	1	1
E	Mahout	(15,20]	2016	12	No	NA	2	No_pref	Yes	Long_term	0	0	0	0	0	0	0	0	0	0	0	0	0	0	No	0	NA	1	Yes	more clever	No	it is good now	Normal	Yes	NA	1	1	1	1	1	1	1	4	1	1	1	1	1	1
D	Mahout	(50,55]	1981	36	No	NA	5	No_pref	No	Depends	0	0	0	0	0	0	0	0	0	0	0	0	0	0	Yes	(3,6]	No	1	Yes	NA	No	NA	Pity_nec	No	NA	2	2	1	1	1	2	1	1	2	1	1	1	1	1
NA	Mahout	(20,25]	NA	6	NA	NA	1	NA	NA	NA	NA	NA	NA	0	0	NA	NA	NA	NA	NA	NA	0	0	0	NA	NA	NA	NA	NA	NA	NA	NA	NA	NA	NA	NA	NA	NA	NA	NA	NA	NA	NA	NA	NA	NA	NA	NA	NA
NA	Mahout	(20,25]	NA	12	NA	NA	2	NA	NA	NA	NA	NA	NA	0	0	NA	NA	NA	NA	NA	NA	1	0	1	NA	NA	NA	NA	NA	NA	NA	NA	NA	NA	NA	NA	NA	NA	NA	NA	NA	NA	NA	NA	NA	NA	NA	NA	NA
NA	Mahout	(50,55]	NA	6	NA	NA	1	NA	NA	NA	NA	NA	NA	0	0	NA	NA	NA	NA	NA	NA	1	0	1	NA	NA	NA	NA	NA	NA	NA	NA	NA	NA	NA	NA	NA	NA	NA	NA	NA	NA	NA	NA	NA	NA	NA	NA	NA
NA	Mahout	(25,30]	NA	12	NA	NA	2	NA	NA	NA	NA	NA	NA	0	0	NA	NA	NA	NA	NA	NA	0	0	0	NA	NA	NA	NA	NA	NA	NA	NA	NA	NA	NA	NA	NA	NA	NA	NA	NA	NA	NA	NA	NA	NA	NA	NA	NA
NA	Mahout	(10,15]	NA	30	NA	NA	2	NA	NA	NA	NA	NA	NA	1	0	NA	NA	NA	NA	NA	NA	0	1	1	NA	NA	NA	NA	NA	NA	NA	NA	NA	NA	NA	NA	NA	NA	NA	NA	NA	NA	NA	NA	NA	NA	NA	NA	NA
C	Mahout	(35,40]	2016	7	No	NA	1	Male	No	Long_term	1	0	0	0	0	0	0	0	0	0	0	1	0	1	Yes	(3,6]	No	0	Yes	NA	Yes	find easier way	Pity_nec	Yes	take time, but more sympathy	1	1	1	1	1	2	1	3	1	1	1	1	1	1
D	Mahout	(15,20]	2016	7	Yes	1	1	No_pref	No	Long_term	0	1	0	0	1	0	0	0	0	0	0	2	0	2	No	0	NA	0	NA	NA	NA	NA	NA	NA	NA	2	2	NA	1	1	2	NA	1	2	1	1	1	1	1
D	Mahout	(15,20]	2016	8	No	NA	1	No_pref	No	Depends	0	0	0	0	0	0	0	0	0	0	0	0	0	0	No	0	NA	0	NA	NA	NA	NA	NA	NA	NA	2	2	2	1	2	4	2	1	2	2	1	1	1	1
NA	Mahout	(20,25]	2016	9	No	NA	3	No_pref	Yes	Long_term	0	0	0	0	0	0	0	0	0	0	0	0	0	0	No	0	NA	2	Yes	obedient, easier to handle	No	NA	Pity_nec	Yes	make eles more clever	2	1	2	1	1	2	1	1	1	1	1	1	1	1
C	Mahout	(15,20]	2016	8	No	NA	1	No_pref	No	Depends	0	0	0	0	0	0	0	0	0	0	0	0	0	0	No	0	NA	0	NA	NA	NA	NA	NA	NA	NA	1	1	1	1	1	3	1	1	1	1	1	1	1	1
NA	Mahout	(15,20]	2016	9	No	NA	1	Male	Yes	Long_term	0	0	0	0	0	0	0	0	0	0	0	0	0	0	No	0	NA	0	NA	NA	NA	NA	NA	NA	NA	2	1	1	1	1	2	1	1	2	1	2	1	1	1
E	Mahout	(20,25]	2015	21	No	NA	2	Female	No	Long_term	0	0	0	0	0	0	0	0	0	0	0	0	0	0	No	0	NA	0	Yes	more obedient	No	NA	Normal	No	NA	1	1	NA	1	1	2	1	1	1	1	1	1	1	1
NA	Mahout	(25,30]	2016	10	No	NA	3	No_pref	No	Depends	0	0	0	0	0	0	0	0	0	0	0	0	0	0	No	0	NA	1	Yes	NA	No	NA	Pity_nec	Yes	NA	2	2	NA	1	1	2	1	1	2	1	1	1	1	1
D	Mahout	(15,20]	2016	16	Yes	12	3	No_pref	No	Long_term	0	0	0	0	0	0	0	0	0	0	0	0	0	0	No	0	NA	0	NA	NA	NA	NA	NA	NA	NA	2	2	2	1	1	2	2	1	2	1	1	1	1	1
E	Mahout	(15,20]	2015	11	No	NA	2	NA	NA	NA	NA	NA	NA	NA	NA	NA	NA	NA	NA	NA	NA	NA	NA	NA	No	0	NA	1	Yes	more clever	No	NA	Normal	NA	NA	1	1	NA	1	1	4	1	1	1	1	1	1	1	1
C	Mahout	(20,25]	2016	12	No	NA	1	Female	No	Long_term	0	0	0	0	0	0	0	0	0	0	0	0	0	0	No	0	NA	0	NA	NA	NA	NA	NA	NA	NA	1	1	1	1	1	3	1	1	1	1	1	1	1	1
NA	Mahout	(25,30]	2005	144	Yes	6	15	No_pref	Yes	Long_term	0	0	0	1	0	0	0	0	0	0	0	0	1	1	Yes	(1,3]	No	8	Yes	Easier to handle	No	NA	Pity_nec	Yes	in future	2	1	4	1	1	1	1	2	4	1	1	1	1	1
NA	Mahout	(10,15]	2016	12	No	NA	1	Female	No	Long_term	0	0	0	0	1	0	0	0	0	0	0	1	0	1	No	0	No	0	NA	NA	NA	NA	Unsure	NA	NA	1	1	2	1	1	2	1	1	1	1	1	1	1	1
NA	Mahout	(15,20]	2016	12	No	NA	1	Male	No	Long_term	0	0	0	0	0	0	0	0	0	0	0	0	0	0	No	0	NA	0	NA	NA	NA	NA	NA	NA	NA	2	2	2	1	1	3	1	1	2	1	1	1	1	1
F	Mahout	(15,20]	2016	12	No	NA	1	Male	Yes	Long_term	0	0	0	0	0	0	0	0	0	0	0	0	0	0	No	0	NA	1	Yes	for future handling	Yes	for better handling in future	Normal	Yes	so less pain in future	1	1	1	1	1	2	1	1	4	1	1	1	1	1
C	Mahout	(15,20]	2016	14	No	NA	2	Male	No	Long_term	0	0	0	0	0	0	0	0	1	0	0	1	0	1	No	0	NA	0	NA	NA	NA	NA	NA	NA	NA	1	1	1	1	1	2	2	1	1	1	1	1	1	1
D	Mahout	(15,20]	2016	12	Yes	1	1	NA	NA	NA	NA	NA	NA	NA	NA	NA	NA	NA	NA	NA	NA	NA	NA	NA	No	0	No	1	Yes	NA	Yes	NA	Pity_nec	No	NA	2	1	2	1	1	2	1	1	2	1	1	2	1	1
NA	Mahout	(25,30]	2004	132	No	NA	3	No_pref	No	Depends	0	0	2	0	0	0	0	0	0	0	0	0	2	2	No	0	No	10	Yes	easier to handle and clever	No	NA	Normal	Yes	better for future	1	1	1	1	1	2	1	1	1	1	1	1	1	1
D	Mahout	(15,20]	2016	12	No	NA	1	No_pref	Unsure	Long_term	0	0	0	0	0	0	0	0	0	0	0	0	0	0	No	0	NA	1	Yes	more clever	No	NA	Pity_nec	No	NA	2	2	2	1	1	2	2	1	2	1	1	2	1	1
E	Mahout	(20,25]	2016	12	No	NA	2	Male	No	Long_term	0	0	0	0	0	1	0	0	0	0	0	0	1	1	No	0	NA	0	NA	NA	NA	NA	NA	NA	NA	1	1	NA	1	1	2	1	1	1	1	1	1	1	1
E	Mahout	(15,20]	2016	12	No	NA	1	No_pref	No	Long_term	0	0	0	0	0	0	0	0	0	0	0	0	0	0	No	0	NA	0	Yes	learn to be clever	No	it is good now	Normal	Yes	NA	1	1	1	1	1	2	1	1	1	1	1	1	1	1
NA	Mahout	(25,30]	NA	15	NA	NA	2	NA	NA	NA	NA	NA	NA	0	1	NA	NA	NA	NA	NA	NA	1	0	1	NA	NA	NA	NA	NA	NA	NA	NA	NA	NA	NA	NA	NA	NA	NA	NA	NA	NA	NA	NA	NA	NA	NA	NA	NA
NA	Mahout	(25,30]	NA	108	NA	NA	2	NA	NA	NA	NA	NA	NA	0	0	NA	NA	NA	1	NA	NA	1	0	1	NA	NA	NA	NA	NA	NA	NA	NA	NA	NA	NA	NA	NA	NA	NA	NA	NA	NA	NA	NA	NA	NA	NA	NA	NA
NA	Mahout	(15,20]	NA	60	NA	NA	2	NA	NA	NA	NA	NA	NA	1	0	NA	NA	NA	NA	NA	NA	1	0	1	NA	NA	NA	NA	NA	NA	NA	NA	NA	NA	NA	NA	NA	NA	NA	NA	NA	NA	NA	NA	NA	NA	NA	NA	NA
NA	Mahout	(15,20]	NA	13	NA	NA	2	NA	NA	NA	NA	NA	NA	1	0	NA	NA	NA	NA	NA	NA	1	1	2	NA	NA	NA	NA	NA	NA	NA	NA	NA	NA	NA	NA	NA	NA	NA	NA	NA	NA	NA	NA	NA	NA	NA	NA	NA
E	Mahout	(20,25]	2016	13	No	NA	1	No_pref	No	Long_term	0	0	0	0	0	0	0	0	0	0	0	0	0	0	Yes	(1,3]	NA	0	Yes	more obedient	No	NA	Normal	Sometimes	need traditional first, but less pain and then positive reinforcement	1	1	NA	1	1	2	1	1	1	1	1	1	1	1
E	Mahout	(25,30]	2010	84	Yes	12	2	No_pref	No	Long_term	0	0	0	0	0	0	0	0	0	0	0	0	0	0	No	0	NA	2	Yes	more obedient	No	NA	Normal	NA	NA	1	1	NA	1	1	1	1	1	1	1	1	1	1	1
NA	Mahout	(15,20]	NA	14	NA	NA	1	NA	NA	NA	NA	NA	NA	0	0	NA	NA	NA	NA	NA	NA	0	0	0	NA	NA	NA	NA	NA	NA	NA	NA	NA	NA	NA	NA	NA	NA	NA	NA	NA	NA	NA	NA	NA	NA	NA	NA	NA
NA	Mahout	(15,20]	2016	15	No	NA	1	No_pref	No	Short_term	0	1	0	0	0	0	0	0	0	0	0	1	0	1	No	0	NA	0	NA	NA	NA	NA	NA	NA	NA	2	NA	2	1	2	4	1	1	2	2	1	2	1	1
E	Mahout	(20,25]	2016	15	No	NA	1	Male	No	Long_term	0	2	0	0	0	0	0	0	0	0	0	2	0	2	Yes	(1,3]	No	1	Yes	more obedient	Yes	need more understanding of the taming process	Pity_nec	NA	NA	1	1	NA	1	1	1	1	1	1	1	1	1	1	1
D	Mahout	(15,20]	2016	15	Yes	1	1	No_pref	No	Long_term	0	0	0	0	0	0	0	0	0	0	0	0	0	0	No	0	NA	1	Yes	NA	Yes	NA	Pity_nec	NA	NA	2	2	3	1	1	2	2	1	4	2	1	1	1	1
C	Mahout	(25,30]	2015	16	No	NA	1	Male	No	Long_term	0	0	0	0	0	0	0	0	1	0	0	1	0	1	Yes	(3,6]	NA	1	Yes	NA	Yes	to be kinder to eles	Pity_nec	Yes	for less pain more gain	1	1	1	1	1	1	1	1	1	1	1	1	1	1
C	Mahout	(30,35]	2008	108	No	NA	4	No_pref	Yes	Long_term	0	0	0	1	0	0	0	0	0	0	0	0	1	1	Yes	0	NA	0	Yes	convenience	Yes	Sometimes, should be softer to the eles- being harsh makes eles more rude	Pity_nec	Sometimes	necessary for taming, but not after	1	1	1	1	1	1	1	1	1	1	1	1	1	1
NA	Mahout	(25,30]	2015	18	No	NA	1	Female	No	Long_term	0	0	0	0	0	0	0	0	0	0	0	0	0	0	Yes	(1,3]	No	1	Yes	clever, and not hurt in future	No	NA	Pity_nec	Yes	more obedient	2	2	2	1	1	2	1	2	2	1	1	1	1	1
NA	Mahout	(25,30]	NA	18	NA	NA	1	NA	NA	NA	NA	NA	NA	0	0	NA	NA	NA	NA	NA	NA	0	0	0	NA	NA	NA	NA	NA	NA	NA	NA	NA	NA	NA	NA	NA	NA	NA	NA	NA	NA	NA	NA	NA	NA	NA	NA	NA
E	Mahout	(35,40]	2010	84	No	NA	3	No_pref	NA	Long_term	0	0	0	0	0	0	0	0	0	0	0	0	0	0	Yes	(3,6]	Yes	3	Yes	more obedient	No	NA	Normal	NA	NA	1	1	1	1	1	1	1	1	1	1	1	1	1	1
C	Mahout	(20,25]	2015	24	No	NA	1	Male	No	Long_term	0	0	0	0	0	1	0	0	0	0	0	0	1	1	Yes	(1,3]	NA	1	Yes	to tame	Yes	reduce pain	Pity_nec	Yes	reduce pain	1	1	1	1	1	2	1	1	1	1	1	1	1	1
E	Mahout	(15,20]	2015	24	No	NA	1	No_pref	No	Long_term	0	0	0	0	0	0	0	0	0	0	0	0	0	0	No	0	NA	1	Yes	to be clever, and in control	Yes	for more control	Normal	Yes	NA	1	1	1	1	1	2	1	1	2	1	1	1	1	1
C	Mahout	(15,20]	2015	24	No	NA	1	Female	No	Long_term	0	0	0	0	0	0	0	1	4	0	0	4	1	5	No	0	NA	1	Yes	NA	Yes	NA	Pity_nec	Sometimes	NA	1	1	1	1	1	2	1	1	1	1	1	1	1	1
D	Mahout	(20,25]	2015	24	Yes	1	3	No_pref	No	Long_term	0	1	0	0	0	0	0	0	0	0	0	1	0	1	No	0	NA	1	No	NA	No	NA	Pity_nec	Yes	pity elephants	2	1	NA	2	1	1	1	1	2	1	1	1	1	1
E	Mahout	(25,30]	2015	24	No	NA	1	No_pref	No	Long_term	0	1	0	0	0	0	0	1	3	0	0	4	1	5	No	0	NA	0	Yes	more clever	Yes	to make eles more clever	Normal	No	NA	1	1	1	1	1	NA	1	1	1	1	1	1	1	1
D	Mahout	(45,50]	1985	144	Yes	24	8	No_pref	No	Long_term	0	1	0	0	0	0	0	0	0	0	2	3	0	3	Yes	(3,6]	Yes	2	Yes	more clever	Yes	NA	Pity_nec	Yes	NA	1	1	1	1	1	2	1	1	1	1	1	1	1	1
C	Mahout	(20,25]	2015	24	No	NA	2	Female	No	Long_term	0	0	0	0	0	0	0	1	4	0	0	4	1	5	Yes	0	NA	1	Yes	more obedient	No	NA	Pity_nec	Yes	NA	1	1	1	1	1	1	1	1	1	1	1	1	1	1
F	Mahout	(15,20]	2010	84	No	NA	3	No_pref	No	Long_term	0	0	0	0	0	0	0	0	0	0	0	0	0	0	No	0	No	1	Yes	more clever	No	NA	Pity_nec	Yes	for eles who are more clever and obedient	1	1	2	1	1	1	1	1	1	1	1	1	1	1
E	Mahout	(20,25]	2015	24	No	NA	1	No_pref	No	Long_term	0	0	0	0	0	0	0	0	0	0	0	0	0	0	No	0	NA	1	Yes	more clever	No	NA	Normal	No	NA	2	2	2	1	1	2	1	1	2	1	1	1	1	1
NA	Mahout	(25,30]	2011	60	Yes	2	1	NA	NA	NA	NA	NA	NA	0	0	NA	NA	NA	NA	NA	NA	0	0	0	NA	NA	NA	NA	NA	NA	NA	NA	NA	NA	NA	NA	NA	NA	NA	NA	NA	NA	NA	NA	NA	NA	NA	NA	NA
NA	Mahout	(20,25]	NA	120	NA	NA	2	NA	NA	NA	NA	NA	NA	0	0	NA	NA	NA	NA	NA	NA	0	0	0	NA	NA	NA	NA	NA	NA	NA	NA	NA	NA	NA	NA	NA	NA	NA	NA	NA	NA	NA	NA	NA	NA	NA	NA	NA
NA	Mahout	(15,20]	NA	24	NA	NA	1	NA	NA	NA	NA	NA	NA	0	1	NA	NA	NA	NA	NA	NA	0	0	0	NA	NA	NA	NA	NA	NA	NA	NA	NA	NA	NA	NA	NA	NA	NA	NA	NA	NA	NA	NA	NA	NA	NA	NA	NA
NA	Mahout	(20,25]	NA	120	NA	NA	2	NA	NA	NA	NA	NA	NA	0	0	NA	NA	NA	NA	NA	NA	0	1	1	NA	NA	NA	NA	NA	NA	NA	NA	NA	NA	NA	NA	NA	NA	NA	NA	NA	NA	NA	NA	NA	NA	NA	NA	NA
NA	Mahout	(20,25]	NA	48	NA	NA	2	NA	NA	NA	NA	NA	NA	0	1	NA	NA	NA	NA	NA	NA	0	1	1	NA	NA	NA	NA	NA	NA	NA	NA	NA	NA	NA	NA	NA	NA	NA	NA	NA	NA	NA	NA	NA	NA	NA	NA	NA
C	Mahout	(15,20]	2014	36	No	NA	1	Male	No	Long_term	0	0	0	0	0	0	0	0	0	0	0	0	0	0	No	0	NA	2	Yes	more obedient	Yes	if new technique available	Pity_nec	Sometimes	kinder using reward	1	1	1	1	1	2	1	1	1	1	1	2	1	1
E	Mahout	(15,20]	2014	38	No	NA	1	No_pref	No	Long_term	0	1	0	0	0	0	0	0	0	0	0	1	0	1	No	0	NA	3	Yes	understand and obedient	No	NA	Normal	NA	NA	1	1	NA	1	1	1	1	1	1	1	1	1	1	NA
D	Mahout	(45,50]	2012	60	No	NA	4	No_pref	No	Long_term	0	0	0	0	0	0	0	0	0	0	0	0	0	0	Yes	(3,6]	No	3	No	hard	Yes	pity elephants	Pity_nec	Yes	pity elephants	2	5	NA	1	1	2	1	1	2	1	1	1	1	1
NA	Mahout	(25,30]	2014	36	No	NA	1	No_pref	No	Long_term	0	0	0	0	0	0	0	0	0	0	0	0	0	0	Yes	(1,3]	No	2	Yes	more obedient	Yes	NA	Pity_nec	Sometimes	nicer with reward than punishment	1	1	1	1	1	1	1	1	1	1	1	1	1	1
D	Mahout	(20,25]	2011	72	No	NA	1	No_pref	No	Long_term	0	2	0	0	1	0	0	0	0	0	0	3	0	3	Yes	(1,3]	NA	1	Yes	NA	No	NA	Pity_nec	Yes	pity elephants	2	2	NA	1	1	2	1	1	2	1	1	2	1	1
D	Mahout	(35,40]	2006	120	No	NA	2	No_pref	Yes	Long_term	0	1	1	0	0	0	0	0	0	0	0	1	1	2	Yes	(1,3]	NA	1	Yes	NA	Yes	NA	Pity_nec	No	NA	2	2	2	1	1	2	1	1	2	NA	1	1	1	1
C	Mahout	(45,50]	2009	96	No	NA	3	No_pref	Yes	Long_term	0	0	0	0	0	0	0	0	0	0	1	1	0	1	Yes	(3,6]	Yes	8	Yes	easier to control	Yes	kinder way	Pity_nec	Sometimes	need both	1	1	1	1	1	1	1	1	1	1	1	1	1	1
E	Mahout	(15,20]	2013	48	No	NA	2	No_pref	No	Long_term	0	0	0	0	1	0	0	0	0	0	0	1	0	1	No	0	NA	0	Yes	so elephants can learn	No	They are clever the way it is	Normal	No	Need traditional way	1	1	1	1	1	1	1	1	2	1	1	1	1	1
NA	Mahout	(25,30]	2013	48	No	NA	2	No_pref	Yes	Long_term	0	0	0	0	0	0	0	0	0	0	0	0	0	0	Yes	(1,3]	No	0	Yes	Easier to handle	No	NA	Unsure	Sometimes	NA	2	2	4	1	1	2	1	2	2	1	1	1	1	1
D	Mahout	(20,25]	2014	36	No	NA	3	No_pref	No	Long_term	0	0	0	0	0	0	0	0	0	0	0	0	0	0	Yes	(1,3]	U	3	Yes	NA	No	NA	Pity_nec	No	NA	2	2	NA	1	1	2	1	1	2	1	1	1	1	1
E	Mahout	(15,20]	2014	36	No	NA	1	Male	Yes	Long_term	0	1	0	0	0	0	0	0	0	0	0	1	0	1	No	0	NA	2	Yes	can handle elephant after	Yes	to have more control	Normal	Yes	more kind to ele, and eles have better behaviour	1	1	1	1	1	2	1	1	1	1	1	1	1	1
E	Mahout	(15,20]	2014	36	No	NA	NA	No_pref	No	Long_term	0	0	0	0	0	0	0	0	0	0	NA	0	0	0	No	0	NA	0	Yes	more clever	No	traditional way is best for easy control	Normal	Yes	NA	1	1	1	1	1	1	1	1	1	1	1	1	1	1
NA	Mahout	(15,20]	NA	48	NA	NA	2	NA	NA	NA	NA	NA	NA	0	0	NA	NA	NA	NA	NA	NA	0	0	0	NA	NA	NA	NA	NA	NA	NA	NA	NA	NA	NA	NA	NA	NA	NA	NA	NA	NA	NA	NA	NA	NA	NA	NA	NA
NA	Mahout	(15,20]	2013	36	No	NA	1	NA	NA	NA	NA	NA	NA	1	0	NA	NA	NA	NA	NA	NA	0	1	1	NA	NA	NA	NA	NA	NA	NA	NA	NA	NA	NA	NA	NA	NA	NA	NA	NA	NA	NA	NA	NA	NA	NA	NA	NA
NA	Mahout	(15,20]	NA	36	NA	NA	1	NA	NA	NA	NA	NA	NA	0	0	NA	NA	NA	NA	NA	NA	1	0	1	NA	NA	NA	NA	NA	NA	NA	NA	NA	NA	NA	NA	NA	NA	NA	NA	NA	NA	NA	NA	NA	NA	NA	NA	NA
NA	Mahout	(30,35]	NA	96	NA	NA	2	NA	NA	NA	NA	NA	NA	0	0	NA	NA	NA	NA	NA	NA	0	0	0	NA	NA	NA	NA	NA	NA	NA	NA	NA	NA	NA	NA	NA	NA	NA	NA	NA	NA	NA	NA	NA	NA	NA	NA	NA
NA	Mahout	(20,25]	NA	36	NA	NA	2	NA	NA	NA	NA	NA	NA	0	0	NA	NA	NA	NA	NA	NA	1	0	1	NA	NA	NA	NA	NA	NA	NA	NA	NA	NA	NA	NA	NA	NA	NA	NA	NA	NA	NA	NA	NA	NA	NA	NA	NA
NA	Mahout	(25,30]	NA	96	NA	NA	2	NA	NA	NA	NA	NA	NA	0	0	NA	NA	NA	NA	NA	NA	0	0	0	NA	NA	NA	NA	NA	NA	NA	NA	NA	NA	NA	NA	NA	NA	NA	NA	NA	NA	NA	NA	NA	NA	NA	NA	NA
NA	Mahout	(25,30]	2005	144	No	NA	4	No_pref	Yes	Long_term	0	0	0	1	0	0	0	0	0	0	0	0	1	1	Yes	(1,3]	No	2	Yes	more obedient	No	NA	Pity_nec	Yes	would be good	2	1	2	1	1	2	1	2	1	1	1	1	1	1
NA	Mahout	(20,25]	2013	49	No	NA	2	No_pref	No	Depends	0	1	0	0	0	0	0	0	0	0	0	1	0	1	Yes	(1,3]	U	2	Yes	more clever	NA	NA	Pity_nec	No	NA	2	2	NA	1	1	2	1	1	2	2	1	1	1	1
D	Mahout	(20,25]	2008	108	Yes	1	1	No_pref	No	Long_term	0	0	0	0	0	0	0	0	0	0	0	0	0	0	Yes	(1,3]	Yes	2	Yes	NA	No	NA	Pity_nec	Yes	oozie has close relationship, build relationship based on reward	2	2	2	1	1	2	2	1	1	1	1	1	1	1
E	Mahout	(55,60]	2000	204	No	NA	3	No_pref	No	Long_term	0	0	0	0	0	0	0	0	0	0	0	0	0	0	Yes	(3,6]	Yes	7	Yes	make clever	NA	NA	Normal	NA	NA	2	1	1	1	1	2	2	1	2	2	1	1	1	2
C	Mahout	(25,30]	2008	108	No	NA	6	No_pref	Yes	Long_term	0	0	0	0	0	0	0	0	0	0	0	0	0	0	Yes	(1,3]	Yes	5	Yes	more obedient	Yes	reduce stress, take time	Pity_nec	Sometimes	likes idea but takes time	1	1	1	1	1	1	1	1	1	1	1	1	1	1
E	Mahout	(10,15]	2013	48	No	NA	1	No_pref	No	Long_term	0	0	0	0	0	0	0	0	0	0	0	0	0	0	No	0	NA	1	Yes	more clever	No	works well now	Normal	No	traditional way is best	1	1	2	1	1	1	1	1	1	1	1	1	1	1
NA	Mahout	(15,20]	NA	24	NA	NA	1	NA	NA	NA	NA	NA	NA	1	0	NA	NA	NA	NA	NA	NA	1	1	2	NA	NA	NA	NA	NA	NA	NA	NA	NA	NA	NA	NA	NA	NA	NA	NA	NA	NA	NA	NA	NA	NA	NA	NA	NA
NA	Mahout	(15,20]	NA	54	No	NA	1	NA	NA	NA	NA	NA	NA	0	1	NA	NA	NA	NA	NA	NA	1	0	1	NA	NA	NA	NA	NA	NA	NA	NA	NA	NA	NA	NA	NA	NA	NA	NA	NA	NA	NA	NA	NA	NA	NA	NA	NA
E	Mahout	(45,50]	2012	60	No	NA	1	No_pref	No	Long_term	0	0	0	0	0	0	0	0	0	0	0	0	0	0	Yes	(1,3]	NA	2	Yes	more obedient	No	NA	Normal	NA	NA	1	1	NA	1	1	1	1	1	1	1	1	1	1	1
E	Mahout	(25,30]	2011	72	Yes	12	1	No_pref	No	Long_term	0	0	0	0	0	0	0	0	0	0	0	0	0	0	Yes	(1,3]	No	3	Yes	elephants can understand better	No	NA	Normal	NA	NA	1	1	NA	1	1	1	1	1	1	1	1	1	1	1
D	Mahout	(30,35]	2012	60	No	NA	1	No_pref	No	Long_term	0	0	0	0	0	0	0	0	0	0	0	0	0	0	Yes	(1,3]	Yes	0	NA	NA	NA	NA	Pity_nec	NA	NA	2	4	4	1	1	2	1	1	2	1	1	1	1	1
NA	Mahout	(25,30]	2004	156	No	NA	3	Male	No	Long_term	0	0	0	0	0	0	0	0	0	0	0	0	0	0	Yes	(1,3]	NA	10	Yes	for good working and handling	No	NA	Pity_nec	No	need both	1	1	1	1	1	1	1	1	1	1	1	1	1	1
NA	Mahout	(20,25]	2010	84	No	NA	2	Male	No	Long_term	0	0	0	0	0	0	0	0	0	0	0	0	0	0	No	0	NA	0	Yes	teaching to be clever	No	NA	Normal	Yes	No hurt in future	2	2	2	1	1	2	1	1	2	2	2	1	1	1
NA	Mahout	(15,20]	NA	65	NA	NA	1	NA	NA	NA	NA	NA	NA	0	0	NA	NA	NA	NA	NA	NA	0	0	0	NA	NA	NA	NA	NA	NA	NA	NA	NA	NA	NA	NA	NA	NA	NA	NA	NA	NA	NA	NA	NA	NA	NA	NA	NA
NA	Mahout	(45,50]	2011	72	No	NA	1	Female	No	Long_term	0	0	0	0	0	0	0	0	0	0	1	1	0	1	Yes	(3,6]	Yes	2	Yes	more polite	Yes	change technique	Pity_nec	Sometimes	need both	1	1	1	1	1	1	1	1	1	1	1	1	1	1
D	Mahout	(20,25]	2003	168	Yes	12	5	No_pref	No	Long_term	0	0	0	0	0	0	0	0	0	0	0	0	0	0	Yes	(1,3]	No	3	Yes	NA	Yes	NA	Normal	No	NA	2	1	2	1	1	1	2	1	4	1	1	1	1	1
C	Mahout	(40,45]	2009	96	No	NA	2	Female	No	Long_term	0	0	0	0	0	0	0	0	0	0	0	0	0	0	Yes	0	NA	1	Yes	to control	No	NA	Pity_nec	Yes	better but takes time	1	1	1	1	1	1	1	1	1	1	1	1	1	1
C	Mahout	(30,35]	2010	84	No	NA	1	Female	No	Long_term	0	1	0	0	0	0	0	0	0	0	0	1	0	1	Yes	(1,3]	No	3	Yes	train elephants	Yes	willing to change for better technique	Normal	Yes	eles so clever	1	1	1	1	1	1	1	1	1	1	1	1	1	1
NA	Mahout	(20,25]	NA	108	NA	NA	1	NA	NA	NA	NA	NA	NA	0	0	NA	NA	NA	NA	NA	NA	0	0	0	NA	NA	NA	NA	NA	NA	NA	NA	NA	NA	NA	NA	NA	NA	NA	NA	NA	NA	NA	NA	NA	NA	NA	NA	NA
NA	Mahout	(20,25]	NA	113	NA	NA	1	NA	NA	NA	NA	NA	NA	0	1	NA	NA	NA	NA	NA	NA	3	0	3	NA	NA	NA	NA	NA	NA	NA	NA	NA	NA	NA	NA	NA	NA	NA	NA	NA	NA	NA	NA	NA	NA	NA	NA	NA
D	Mahout	(20,25]	2006	132	Yes	12	1	No_pref	No	Depends	0	0	0	0	0	0	0	0	0	0	0	0	0	0	Yes	(1,3]	No	5	Yes	NA	Yes	hard on eles	Pity_nec	Yes	hard on eles now	1	1	1	1	1	2	1	1	2	1	1	1	1	1
NA	Mahout	(20,25]	NA	132	NA	NA	1	NA	NA	NA	NA	NA	NA	0	0	NA	NA	NA	NA	NA	NA	1	0	1	NA	NA	NA	NA	NA	NA	NA	NA	NA	NA	NA	NA	NA	NA	NA	NA	NA	NA	NA	NA	NA	NA	NA	NA	NA
F	Head mahout	(30,35]	2011	72	No	NA	9	Male	Yes	Long_term	0	0	0	1	0	1	0	0	0	0	0	0	2	2	Yes	(1,3]	No	1	Yes	more obedient	Yes	NA	Pity_nec	Yes	for more obedient eles and no hurt	2	1	4	1	1	2	1	1	1	1	1	1	1	1
NA	Head mahout	(30,35]	2005	144	Yes	12	15	Male	Yes	Long_term	0	0	0	0	0	0	0	0	0	0	0	0	0	0	Yes	(1,3]	No	6	Yes	more obedient	No	NA	Normal	Yes	more obedient	1	1	2	1	1	1	1	1	2	1	1	1	1	1
NA	Head mahout	(25,30]	2005	144	No	NA	13	No_pref	Yes	Long_term	0	0	0	0	0	0	6	0	0	0	0	6	0	6	Yes	(1,3]	No	2	Yes	more obedient	No	NA	Pity_nec	Yes	NA	1	1	1	1	1	1	1	1	1	1	1	1	1	1
F	Head mahout	(50,55]	1978	468	Yes	24	10	Male	Yes	Long_term	0	1	0	0	1	0	0	0	0	1	2	4	1	5	Yes	(3,6]	Yes	3	Yes	more obedient	Yes	Would be good to make them more clever/obedient	Pity_nec	Yes	for more clever and obedient eles	1	1	5	1	1	2	1	1	1	1	1	1	1	1
NA	Head mahout	(35,40]	1992	312	Yes	3	9	No_pref	No	Long_term	0	1	0	0	0	0	0	0	1	0	0	2	0	2	Yes	(1,3]	No	3	Yes	easy to handle	No	NA	Pity_nec	Yes	more clever	1	1	4	1	1	2	1	1	2	1	1	1	1	1
NA	Head mahout	(30,35]	2001	192	No	NA	40	No_pref	Yes	Long_term	0	2	0	0	0	0	0	0	1	0	0	3	0	3	Yes	(3,6]	No	13	Yes	Tamer	Yes	Mix with positive reinforcement	Pity_nec	No	need both to work	1	1	1	1	1	1	1	1	1	1	1	1	1	1
NA	Mahout	(35,40]	1992	300	No	NA	15	No_pref	Unsure	Long_term	0	0	0	1	0	0	0	0	0	0	0	0	1	1	No	0	NA	25	Yes	Tamer	Yes	Better technique	Pity_nec	Yes	Reduce pain	1	1	1	1	1	1	1	1	1	1	1	1	1	1
F	Mahout	(55,60]	1974	516	No	NA	5	Male	Yes	Long_term	0	0	0	0	0	0	0	0	0	0	0	0	0	0	Yes	(1,3]	No	43	Yes	more obedient	No	NA	Pity_nec	Yes	Better relationship	1	1	1	1	1	1	1	5	1	1	1	1	1	1
NA	Head mahout	(45,50]	1992	300	No	NA	10	No_pref	Yes	Long_term	0	1	0	0	0	0	0	0	0	0	2	3	0	3	Yes	(3,6]	Yes	15	Yes	more clever, obedient	No	NA	Pity_nec	Yes	more clever	2	1	1	1	1	2	1	2	2	1	1	1	1	1
NA	Head mahout	(40,45]	2000	204	No	NA	6	No_pref	Yes	Long_term	0	2	2	1	0	0	0	0	0	0	0	2	3	5	Yes	(3,6]	Yes	4	Yes	Easier to handle	No	NA	Normal	Yes	more clever	2	2	2	1	1	2	1	2	1	1	1	1	1	1
NA	Head mahout	(35,40]	1996	252	No	NA	2	No_pref	Yes	Long_term	0	1	1	0	0	0	0	0	0	0	0	1	1	2	Yes	(3,6]	No	15	Yes	more clever	No	NA	Pity_nec	No	need both	1	1	1	1	1	1	1	1	1	1	1	1	1	1
NA	Head mahout	(35,40]	1997	240	No	NA	4	Male	Yes	Long_term	0	0	0	0	0	0	0	0	0	0	0	0	0	0	Yes	(1,3]	No	10	Yes	Easier to handle	No	NA	Normal	Yes	clever in future	2	2	4	1	1	2	1	2	2	1	1	2	1	1
NA	Head mahout	(25,30]	2004	156	No	NA	19	No_pref	Yes	Long_term	0	0	0	0	0	0	0	0	0	0	0	0	0	0	Yes	(1,3]	No	2	Yes	more clever	No	NA	Normal	Yes	NA	2	2	2	1	1	2	1	1	2	1	2	1	1	1
D	Mahout	(25,30]	2012	NA	Yes	2	4	No_pref	No	Long_term	0	0	0	0	1	0	0	0	0	0	0	1	0	1	Yes	(1,3]	No	1	Yes	Easier to handle	Yes	NA	NA	NA	NA	NA	NA	NA	NA	NA	NA	NA	NA	NA	NA	NA	NA	NA	NA
F	Head mahout	(25,30]	2009	84	Yes	12	20	No_pref	Yes	Long_term	0	0	0	0	0	0	0	0	0	0	0	0	0	0	No	0	NA	5	Yes	Good for elephant character	No	Effective now	Normal	Yes	No hurt in future	2	2	2	1	1	2	1	2	1	1	2	1	1	1
NA	Head mahout	(45,50]	1986	372	Yes	24	15	No_pref	Yes	Long_term	0	0	0	0	0	0	0	0	0	0	0	0	0	0	No	(3,6]	NA	3	Yes	After, can handle easier	No	Shouldn'�t change it	Pity_nec	Yes	Pity elephants, so in future better to not hurt	1	1	1	1	1	1	1	1	2	1	1	1	1	1
NA	Mahout	(20,25]	2016	NA	Yes	1	2	No_pref	No	Long_term	0	0	0	0	0	0	0	0	0	0	0	0	0	0	No	0	NA	1	Yes	NA	No	NA	Pity_nec	NA	NA	2	2	2	1	1	2	2	1	2	1	1	2	1	1
NA	Mahout	(15,20]	NA	72	NA	NA	2	NA	NA	NA	NA	NA	NA	0	0	NA	NA	NA	NA	NA	NA	1	0	1	NA	NA	NA	NA	NA	NA	NA	NA	NA	NA	NA	NA	NA	NA	NA	NA	NA	NA	NA	NA	NA	NA	NA	NA	NA
E	Mahout	(20,25]	2015	84	No	NA	2	No_pref	No	Long_term	0	0	0	1	0	0	0	0	0	0	0	0	1	1	Yes	0	NA	3	Yes	NA	Yes	NA	Normal	NA	NA	1	1	2	NA	1	1	1	4	1	1	1	1	NA	1
D	Mahout	(20,25]	2015	36	Yes	1	3	No_pref	Yes	Long_term	0	0	0	0	0	0	0	0	0	0	0	0	0	0	Yes	0	NA	3	Yes	more tame for logging	No	This method has been used for long time, so it is good	Pity_nec	No	not easy to work together	2	2	1	1	1	1	1	1	2	1	1	1	1	1
C	Mahout	(15,20]	2007	132	No	NA	10	No_pref	Yes	Long_term	0	0	0	1	0	0	0	0	0	0	0	0	1	1	Yes	(1,3]	Yes	3	Yes	to tame	Yes	wants another method	Pity_nec	Yes	Pity	2	2	1	1	1	1	1	1	5	1	1	1	1	1
D	Mahout	(20,25]	2008	120	No	NA	3	No_pref	Yes	Long_term	0	0	1	0	1	0	0	0	0	0	0	1	1	2	Yes	0	NA	1	Yes	more clever and easy for logging	No	NA	Pity_nec	No	elephants are wild animals so not so easy to tame	2	2	2	1	1	1	1	1	4	2	1	2	1	1
H	Mahout	(40,45]	2000	216	Yes	18	3	Male	No	Long_term	0	1	0	0	0	0	0	0	0	0	0	1	0	1	Yes	(1,3]	No	5	Yes	It contains touch, and singing a song, more familar with elephant	Yes	NA	Pity_nec	Yes	NA	2	2	1	1	1	2	2	2	2	1	2	1	1	1
F	Mahout	(20,25]	2014	48	No	NA	3	No_pref	Yes	Long_term	0	0	0	0	0	0	0	0	1	0	0	1	0	1	Yes	(1,3]	No	1	Yes	obedient for logging	No	NA	Pity_nec	Sometimes	NA	1	1	2	1	1	1	2	1	1	2	1	2	1	1
E	Mahout	(35,40]	2011	84	No	NA	1	No_pref	No	Long_term	0	0	0	0	0	0	0	0	0	0	0	0	0	0	Yes	(3,6]	Yes	10	Yes	Easier to take from forest	No	NA	Normal	No	NA	1	1	1	1	1	1	1	1	1	1	1	1	1	1
E	Mahout	(15,20]	2018	3	No	NA	1	Male	No	Short_term	0	0	0	1	0	0	0	0	0	0	0	0	1	1	No	0	NA	0	NA	NA	NA	NA	NA	NA	NA	2	1	2	1	1	5	1	1	2	1	1	2	1	1
C	Mahout	(20,25]	2009	108	No	NA	3	No_pref	No	Long_term	0	0	0	0	0	0	0	0	0	0	0	0	0	0	Yes	(1,3]	NA	1	Yes	NA	Yes	If eles would become tame, he would like it	Pity_nec	Yes	he likes other techniques	1	1	NA	1	1	1	1	1	1	1	1	1	1	NA
F	Mahout	(15,20]	2017	12	No	NA	1	Female	NA	Long_term	0	0	0	0	0	0	0	0	0	0	0	0	0	0	Yes	0	No	0	Yes	NA	No	NA	NA	NA	NA	2	1	4	1	NA	2	2	1	3	1	1	1	1	NA
D	Mahout	(20,25]	1992	144	Yes	NA	3	No_pref	Yes	Long_term	0	1	0	0	1	0	0	0	0	0	0	2	0	2	Yes	(1,3]	NA	4	Yes	more clever	Yes	NA	Pity_nec	Sometimes	pity	1	1	2	1	1	2	1	1	4	1	1	1	1	1
D	Mahout	(15,20]	2018	3	NA	NA	NA	NA	NA	NA	NA	NA	NA	NA	NA	NA	NA	NA	NA	NA	NA	NA	NA	NA	NA	NA	NA	NA	NA	NA	NA	NA	NA	NA	NA	NA	NA	NA	NA	NA	NA	NA	NA	NA	NA	NA	NA	NA	NA
C	Mahout	(20,25]	2013	61	No	NA	3	No_pref	Yes	Long_term	0	0	0	0	0	0	0	0	0	0	0	0	0	0	No	0	NA	1	Yes	more polite	No	NA	Pity_nec	No	NA	1	1	NA	1	1	1	1	1	1	1	1	1	1	1
C	Mahout	(35,40]	2000	216	No	NA	4	No_pref	Yes	Long_term	0	2	0	0	0	0	0	1	0	0	0	2	1	3	Yes	(1,3]	No	2	Yes	more polite	Yes	would like a softer way	Pity_nec	Yes	for the elephants	1	1	NA	1	1	1	1	1	1	1	1	1	1	1
D	Mahout	(20,25]	2016	25	Yes	0.5	2	No_pref	No	Long_term	0	0	0	0	0	0	0	0	0	0	0	0	0	0	No	0	NA	1	Yes	more tame	No	NA	Pity_nec	No	if no punishment, would take more time	2	2	2	1	1	2	1	1	2	2	1	2	1	1
C	Mahout	(15,20]	2014	42	No	NA	1	No_pref	No	Long_term	0	0	0	0	0	0	0	0	0	0	0	0	0	0	No	0	NA	0	NA	NA	NA	NA	NA	NA	NA	1	1	1	1	1	1	2	1	1	1	1	1	1	1
D	Mahout	(20,25]	2015	40	No	NA	2	No_pref	No	Long_term	0	0	0	0	0	0	0	0	0	0	0	0	0	0	Yes	(1,3]	No	0	Yes	more clever	Yes	little or no wound	Pity_nec	No	NA	2	1	2	1	1	2	1	1	2	1	2	1	1	1
E	Mahout	(15,20]	2017	12	No	NA	1	No_pref	No	Long_term	0	0	0	0	0	0	0	0	0	0	0	0	0	0	No	0	NA	0	NA	NA	NA	NA	NA	NA	NA	1	1	2	1	1	2	1	1	1	1	1	1	1	1
E	Mahout	(15,20]	2018	3	No	NA	1	No_pref	No	Long_term	0	0	0	0	0	0	0	0	0	0	0	0	0	0	No	0	NA	0	NA	NA	NA	NA	NA	NA	NA	1	1	2	1	1	5	2	1	1	1	1	2	2	1
F	Mahout	(15,20]	2016	24	No	NA	2	No_pref	No	Long_term	0	0	0	0	0	0	0	0	0	0	0	0	0	0	No	0	NA	1	Yes	NA	No	NA	Pity_nec	No	NA	1	1	2	1	1	2	1	1	1	1	1	1	1	1
E	Mahout	(15,20]	2017	9	No	NA	2	No_pref	No	Long_term	0	0	0	0	0	0	0	0	0	0	0	0	0	0	No	0	NA	1	Yes	teaching elephant what they should and shouldn't do	No	NA	Normal	NA	NA	1	1	NA	1	1	3	2	1	1	1	1	1	NA	1
C	Mahout	(25,30]	2013	60	Yes	2	3	No_pref	Yes	Long_term	0	0	0	0	0	0	0	1	0	0	0	0	1	1	Yes	0	NA	1	Yes	more clever	NA	NA	Pity_nec	NA	NA	1	1	NA	1	1	1	1	1	1	1	1	1	1	1
F	Mahout	(20,25]	2013	60	No	NA	4	No_pref	Yes	Long_term	0	1	0	0	0	0	0	0	0	0	0	1	0	1	Yes	0	No	3	Yes	for logging	Yes	NA	Pity_nec	Yes	for more clever and more tame eles	1	1	1	1	1	2	1	1	1	1	1	1	1	1
F	Mahout	(25,30]	2016	17	No	NA	3	No_pref	Yes	Long_term	0	0	0	0	0	0	0	0	0	0	0	0	0	0	Yes	(1,3]	No	0	NA	NA	NA	NA	NA	NA	NA	1	2	4	1	1	2	4	1	4	1	1	1	4	1
F	Mahout	(20,25]	2017	7	No	NA	1	No_pref	No	Long_term	0	0	0	0	0	1	0	0	0	0	0	0	1	1	Yes	(1,3]	No	1	Yes	easier to manage	No	NA	Normal	No	NA	4	2	2	1	1	4	1	1	2	1	1	1	1	1
D	Mahout	(25,30]	2014	42	No	NA	4	No_pref	No	Long_term	0	0	0	0	0	0	0	0	0	0	0	0	0	0	No	0	NA	1	Yes	more tame	No	NA	Pity_nec	Yes	pity so want to spend more time	2	2	1	1	1	2	1	1	2	1	1	1	1	1
F	Mahout	(10,15]	2017	12	No	NA	4	No_pref	No	Long_term	0	0	0	0	0	0	1	0	0	0	0	1	0	1	No	0	No	0	NA	NA	NA	NA	NA	NA	NA	2	2	4	1	1	4	4	1	2	1	4	1	4	1
D	Mahout	(25,30]	2016	192	No	NA	6	No_pref	Yes	Long_term	0	0	0	0	0	0	0	0	0	0	0	0	0	0	Yes	(1,3]	Yes	1	Yes	more tame	Yes	need more time to make more tame	Pity_nec	Yes	pity	2	4	1	1	1	1	1	1	2	1	1	1	1	1
D	Mahout	(15,20]	2016	30	Yes	0.5	4	Female	No	Long_term	0	0	0	0	0	0	0	0	0	0	0	0	0	0	No	0	NA	0	Yes	more easy to work	Yes	pity	Pity_nec	No	difficult to train	4	4	1	1	1	1	1	1	5	1	1	1	1	1
F	Mahout	(15,20]	2018	3	No	NA	1	No_pref	No	Short_term	0	0	0	0	0	0	0	0	0	0	0	0	0	0	Yes	0	No	0	Yes	NA	No	NA	Unsure	No	NA	1	2	1	1	4	5	2	1	4	2	4	1	1	1
F	Mahout	(15,20]	2018	48	No	NA	2	No_pref	NA	Long_term	0	0	0	0	0	0	0	1	0	0	0	0	1	1	No	0	No	1	Yes	NA	No	NA	Normal	No	NA	1	2	2	1	1	2	4	1	2	1	2	1	1	1
D	Mahout	(20,25]	2017	13	No	NA	3	No_pref	No	Long_term	0	0	0	0	0	0	0	0	0	0	0	0	0	0	No	0	NA	1	Yes	He got knowledge and elephant is more tame	No	NA	Pity_nec	No	NA	2	2	2	1	1	2	1	1	2	1	1	1	1	1
F	Mahout	(15,20]	2017	9	No	NA	1	No_pref	No	Long_term	0	0	0	0	0	0	0	0	0	0	0	0	0	0	No	0	No	0	NA	NA	Yes	NA	Unsure	Sometimes	NA	2	2	4	1	1	4	1	1	1	1	1	1	4	1
D	Mahout	(20,25]	2010	39	No	NA	4	No_pref	No	Long_term	0	0	0	1	0	0	0	0	0	0	0	0	1	1	No	0	NA	1	Yes	easy to manage	Yes	have wound	Pity_nec	Yes	pity	1	2	NA	1	1	1	2	1	2	1	1	1	1	1
F	Mahout	(20,25]	2017	9	No	NA	1	No_pref	No	Long_term	0	0	1	0	0	0	0	0	0	0	0	0	1	1	Yes	(1,3]	No	0	Yes	NA	No	NA	Normal	Yes	NA	2	2	2	1	1	2	1	1	1	1	1	1	4	1
F	Head mahout	(35,40]	2008	120	No	NA	2	No_pref	No	Long_term	0	0	0	0	0	0	0	0	0	0	1	1	0	1	Yes	(1,3]	Yes	1	Yes	understand orders after	Yes	NA	Pity_nec	Yes	NA	1	2	2	1	1	2	2	1	1	1	1	1	2	1
F	Mahout	(25,30]	2009	108	No	NA	1	No_pref	No	Long_term	0	0	0	0	0	0	0	0	0	0	0	0	0	0	Yes	(1,3]	NA	1	Yes	obedient, easy to manage for logging	No	NA	Normal	No	NA	2	2	NA	1	1	2	1	1	1	1	1	1	2	NA
H	Mahout	(20,25]	2015	36	No	NA	1	No_pref	Unsure	Long_term	0	0	0	0	0	0	0	0	0	0	0	0	0	0	No	0	NA	2	Yes	easier to manage, traditional taming is good	No	No change, traditional way is good	Normal	No	NA	2	2	2	1	2	2	1	2	2	2	1	2	2	1
H	Head mahout	(35,40]	1997	249	No	NA	3	Female	No	Long_term	0	2	0	0	0	0	0	0	0	0	1	3	0	3	Yes	(1,3]	Yes	10	Yes	Obedient, easier to manage for logging	No	taming with traditional cradles best	Pity_nec	No	NA	2	2	2	1	1	2	2	2	2	1	1	1	1	1
H	Head mahout	(30,35]	2008	120	No	NA	2	No_pref	Yes	Long_term	0	2	0	0	0	0	0	0	0	0	0	2	0	2	Yes	(1,3]	No	5	Yes	easier to manage, traditional taming is good	No	taming with traditional cradles is best	Pity_nec	No	Sometimes need to penalize	2	2	2	1	2	2	2	2	2	2	1	2	1	1
H	Mahout	(30,35]	1996	256	No	NA	4	No_pref	Yes	Long_term	0	0	0	0	0	0	0	0	0	0	0	0	0	0	Yes	0	No	6	Yes	Understand commands after	No	Taming is traditional, No hurt	Normal	Yes	Need more understanding	2	2	2	1	1	2	2	2	2	1	1	1	1	1
H	Mahout	(25,30]	2010	93	No	NA	2	Male	No	Long_term	0	0	0	0	0	0	0	0	0	0	0	0	0	0	No	0	NA	3	Yes	easier to manage, traditional taming is good	No	No change, traditional good	Normal	No	Can only tame tied elephant	2	2	2	1	2	2	2	2	2	1	1	2	2	1
H	Head mahout	(30,35]	1999	225	Yes	18	3	Male	Yes	Long_term	0	1	0	0	0	1	0	0	0	0	0	1	1	2	Yes	(1,3]	No	6	Yes	For learning to log, ecotourism, elephant show	Yes	should tame from baby	Normal	Yes	Elephant taming is traditional in Myanmar	1	1	2	1	1	2	2	2	2	1	1	1	1	1
H	Mahout	(30,35]	2008	120	No	NA	3	Male	Yes	Long_term	0	1	0	0	0	0	0	0	0	0	0	1	0	1	Yes	(1,3]	No	3	Yes	easier to manage	No	should use traditional taming	Normal	No	Sometimes need to penalize	2	2	2	1	1	2	2	2	2	2	1	2	1	1
H	Mahout	(25,30]	2013	62	Yes	6	3	Male	No	Long_term	0	0	0	0	0	0	0	0	0	0	0	0	0	0	Yes	(1,3]	No	1	Yes	To prevent losing elephants	No	NA	Normal	Yes	Give rewards	2	1	1	1	1	2	1	1	2	1	2	2	2	1
H	Mahout	(45,50]	1991	324	Yes	6	3	Male	No	Long_term	0	0	0	0	0	0	0	0	0	0	0	0	0	0	Yes	(1,3]	No	5	Yes	Easier to manage, taming is good	No	NA	Pity_nec	Yes	during taming, give supplement rice, banana, suger cane, tamarind for prize	1	1	1	1	1	2	2	2	3	2	1	1	1	1
H	Mahout	(20,25]	2013	58	No	NA	2	No_pref	No	Long_term	0	2	0	0	0	0	0	0	0	0	0	2	0	2	No	0	NA	0	NA	NA	NA	NA	NA	NA	NA	2	2	NA	1	1	2	2	2	2	2	1	1	2	1
H	Mahout	(30,35]	2006	144	No	NA	3	Male	Yes	Long_term	0	1	1	0	0	0	0	0	0	0	0	1	1	2	Yes	(1,3]	No	8	Yes	easier to log	No	Traditional taming is good	Normal	No	Sometimes need to penalize	2	2	2	1	2	2	2	2	2	2	1	2	1	1
H	Mahout	(15,20]	2016	25	No	NA	1	Male	Unsure	Long_term	0	2	0	0	0	0	0	0	0	0	0	2	0	2	No	0	NA	1	Yes	easier to take from pasture	No	Traditional taming is good	Unsure	No	Sometimes need to penalize eles	2	2	NA	1	2	2	2	2	2	2	1	2	1	1
H	Mahout	(25,30]	2012	69	No	NA	2	No_pref	Unsure	Long_term	0	1	0	0	0	0	0	0	0	0	0	1	0	1	Yes	(1,3]	No	2	Yes	easier to manage, good for logging	No	Traditional taming is good	Pity_nec	No	Sometimes need to penalize during taming	2	2	2	1	2	2	2	2	2	2	1	2	2	1
H	Mahout	(25,30]	2014	48	No	NA	1	Male	Unsure	Depends	0	0	0	0	0	0	0	0	0	0	0	0	0	0	Yes	(1,3]	No	1	Yes	easier to manage	No	NA	Unsure	No	NA	2	2	2	1	2	2	2	2	2	2	1	2	2	1
F	Mahout	(10,15]	2015	30	No	NA	3	No_pref	No	Long_term	0	1	0	1	0	0	0	0	0	0	0	1	1	2	No	0	No	0	Yes	Happy, easy to log	No	NA	Pity_nec	No	NA	1	1	2	1	1	2	1	1	1	1	2	1	1	NA
F	Mahout	(20,25]	2016	24	No	NA	1	No_pref	Yes	Short_term	0	0	0	0	0	0	0	0	0	0	0	0	0	0	Yes	(1,3]	No	0	Yes	easy to manage	No	NA	Normal	Yes	NA	1	1	2	1	1	2	1	1	1	1	1	1	1	NA
F	Mahout	(15,20]	2015	36	No	NA	1	No_pref	No	Long_term	0	0	0	0	0	0	0	0	0	0	0	0	0	0	Yes	(1,3]	No	0	Yes	NA	No	NA	Unsure	No	NA	2	1	1	1	1	2	2	1	1	1	1	1	2	1
F	Mahout	(35,40]	2015	24	No	NA	2	No_pref	Yes	Long_term	0	0	0	0	0	0	0	0	0	0	1	1	0	1	Yes	(3,6]	Yes	0	Yes	NA	No	NA	Unsure	No	NA	1	2	2	1	1	2	2	1	2	1	1	1	1	1
C	Mahout	(25,30]	2009	108	No	NA	3	No_pref	No	Long_term	0	0	0	0	0	0	0	0	0	0	0	0	0	0	No	0	NA	2	Yes	easy to handle	No	NA	Normal	NA	NA	1	1	1	1	1	1	1	1	1	1	1	1	1	1
C	Mahout	(15,20]	2017	8	No	NA	1	No_pref	No	Long_term	0	0	0	0	0	0	0	0	0	0	0	0	0	0	No	0	NA	0	Yes	easy to handle	NA	NA	NA	NA	NA	1	1	NA	1	1	1	4	1	1	1	1	1	1	1
C	Mahout	(30,35]	2011	84	No	NA	4	No_pref	Yes	Long_term	0	0	0	0	0	0	0	0	0	0	0	0	0	0	Yes	(1,3]	No	3	Yes	more tame	No	NA	Normal	No	NA	1	1	NA	1	1	2	1	1	1	1	1	1	1	1
C	Mahout	(20,25]	2013	60	No	NA	5	No_pref	Yes	Long_term	0	0	0	0	0	0	0	0	0	0	0	0	0	0	No	0	NA	1	Yes	more clever, good experience	No	NA	Normal	Sometimes	NA	1	1	NA	1	1	2	1	1	1	1	1	1	1	1
C	Mahout	(20,25]	2014	48	No	NA	4	No_pref	Yes	Long_term	0	0	0	0	0	0	0	0	0	0	0	0	0	0	No	0	NA	1	Yes	more clever	NA	NA	Normal	No	NA	1	1	NA	1	1	2	1	1	1	1	1	1	1	1
E	Mahout	(25,30]	2017	12	No	NA	1	NA	NA	NA	NA	NA	NA	NA	NA	NA	NA	NA	NA	NA	NA	NA	NA	NA	Yes	(3,6]	No	0	NA	NA	NA	NA	NA	NA	NA	1	1	1	1	1	2	1	1	1	1	1	1	1	1
B	Mahout	(25,30]	2015	38	Yes	NA	2	No_pref	Yes	Long_term	0	0	0	0	0	NA	0	0	0	0	0	0	0	0	No	0	NA	2	Yes	more tame	Yes	more tame	Normal	Sometimes	NA	1	1	2	1	1	2	1	1	2	2	1	1	1	1
G	Mahout	(25,30]	2011	84	No	NA	5	No_pref	No	Long_term	0	0	0	0	0	0	0	0	0	0	0	0	0	0	Yes	0	NA	1	Yes	NA	No	NA	Unsure	Yes	NA	1	1	1	1	NA	1	2	4	1	1	1	1	1	1
G	Mahout	(25,30]	2017	6	No	NA	1	No_pref	No	Long_term	0	0	0	0	0	0	0	0	0	0	0	0	0	0	Yes	(1,3]	No	1	Yes	NA	No	NA	Normal	Yes	NA	1	1	1	1	1	2	2	1	4	1	1	1	1	1
B	Mahout	(20,25]	2016	54	No	NA	3	No_pref	Yes	Long_term	0	0	0	0	0	0	0	0	0	0	0	0	0	0	Yes	(1,3]	NA	1	Yes	NA	Yes	more tame	Pity_nec	Yes	NA	2	2	1	1	1	2	1	1	2	1	1	1	1	1
C	Mahout	(55,60]	1986	240	No	NA	5	No_pref	Yes	Long_term	0	0	0	0	0	0	0	0	0	0	2	2	0	2	Yes	(3,6]	Yes	NA	Yes	To tame them	No	NA	Normal	Sometimes	NA	1	1	NA	1	1	1	1	3	1	1	1	1	1	1
[truncated: 25 more columns]
